# Supplementary material
Source: PubMed Central journal article supplement (PMC3021597)
Supplement: NIHMS248347-supplement-1_si_001.pdf [file NIHMS248347-supplement-1_si_001.pdf]

# Supporting Online Material for

## Lysophosphatidylcholine is Generated by

### Spontaneous Deacylation of Oxidized Phospholipids

*Jaewoo Choi, Wujuan Zhang, Xiaodong Gu, Xi Chen, Li Hong, James M. Laird and Robert G. Salomon\**

*Department of Chemistry, Case Western Reserve University, Cleveland, Ohio, 44106, USA*

All solvents were distilled under a nitrogen atmosphere prior to use, and all materials were obtained from Aldrich unless specified. Flash chromatography was performed using ACS grade solvents from Fisher Scientific (Hanover Park, IL).  $R_f$  values are quoted for TLC plates of thickness 0.25 mm from Whatman (Florham Park, NJ). Plates were visualized using iodine, dinitrophenylhydrazine, or phosphomolybdic acid reagent. Flash column chromatography was performed on 230-400 mesh silica gels supplied by Whatman and Sorbent Technologies Inc. (Atlanta, GA).

**Table S1.** Elution gradient for separating phospholipids by HPLC

| Time (min) | CH <sub>3</sub> OH (%) | H <sub>2</sub> O (%) | Curve |
|------------|------------------------|----------------------|-------|
| 0          | 85                     | 15                   | *     |
| 6          | 85                     | 15                   | 6     |
| 18         | 88                     | 12                   | 6     |
| 20         | 100                    | 0                    | 6     |
| 36         | 100                    | 0                    | 6     |
| 37         | 85                     | 15                   | 6     |
| 43         | 85                     | 15                   | 1     |

**Table S2.** Optimized parameters for the mass spectrometric detection of phospholipids and lactone derivatives

|                 | AA-PAF, LA-PAF | HOHA-PC, HOOA-PC, HODA-PC, KOHA-PC<br>oxPCs-furan | DNPH derivs |
|-----------------|----------------|---------------------------------------------------|-------------|
| Ion mode        | positive       | positive                                          | negative    |
| Capillary (kV)  | 5.00           | 5.00                                              | 4.00        |
| Cone (V)        | 30             | 50                                                | 35          |
| Hex 1 (V)       | 30             | 50.0                                              | 30.0        |
| Aperture (V)    | 0.0            | 0.0                                               | 0.0         |
| Hex 2 (V)       | 1.0            | 1.0                                               | 1.0         |
| LM 1 resolution | 15.0           | 15.0                                              | 15.0        |
| HM 1 resolution | 15.0           | 15.0                                              | 15.0        |
| Ion energy 1    | 1.0            | 1.0                                               | 1.0         |
| LM 2 resolution | 15.0           | 15.0                                              | 15.0        |
| HM 2 resolution | 15.0           | 15.0                                              | 15.0        |
| Ion energy 2    | 2.0            | 2.0                                               | 2.0         |

**Table S3.** MRM transition ion pair and optimal collision energy for the analytes

| Analytes          | MRM (m/z)<br>transition ion pair | Collision Energy (eV) |
|-------------------|----------------------------------|-----------------------|
| KOHA-PC           | 634 > 184                        | 35                    |
| AA-PAF            | 745 > 184                        | 24                    |
| LA-PAF            | 678 > 184                        | 24                    |
| LysoPAF           | 510 > 184                        | 24                    |
| HOHA-PC           | 636 > 184                        | 40                    |
| HOOA-PC           | 651 > 184                        | 35                    |
| HODA-PC           | 706 > 184                        | 35                    |
| oxPC-furan (2)    | 618 > 184                        | 40                    |
| oxPC-furan (3)    | 632 > 184                        | 20                    |
| oxPC-furan (7)    | 688 > 184                        | 20                    |
| LysoPC            | 496 > 184                        | 30                    |
| HOHA lactone-DNPH | 319 > 152                        | 18                    |
| HOOA lactone-DNPH | 333 > 152                        | 14                    |
| Cinnam-DNPH       | 311 > 181                        | 24                    |

Figure S1

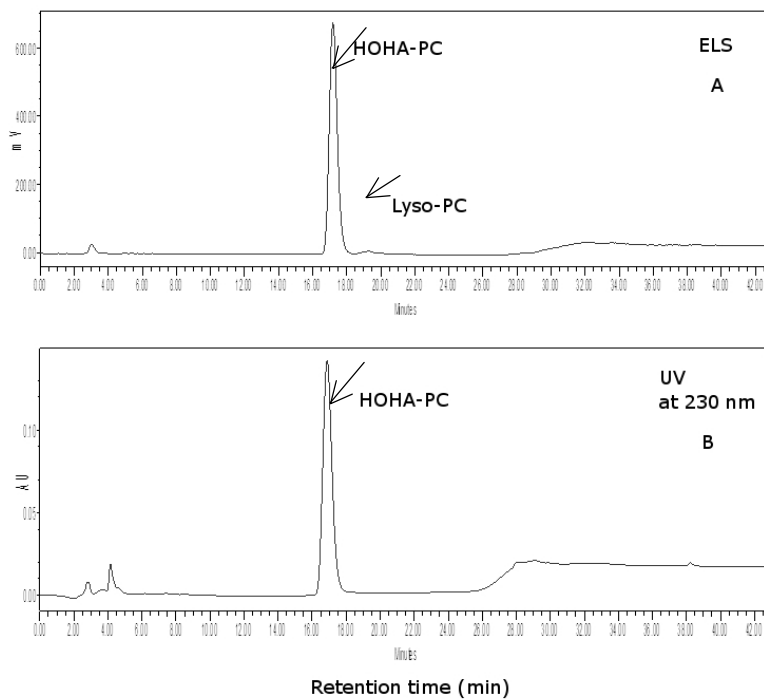

**Figure S1.** HPLC chromatogram of authentic HOHA-PC containing traces of lysoPC with (A) ELS or (B) UV detection.

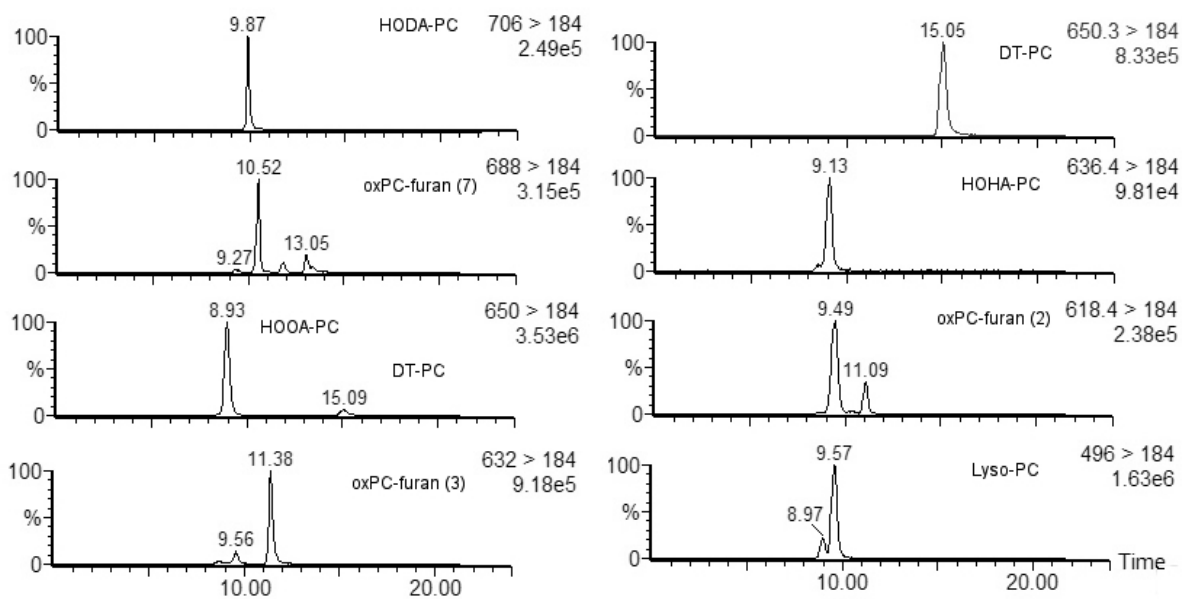

**Fig S2.** MRM HPLC chromatogram of phospholipids

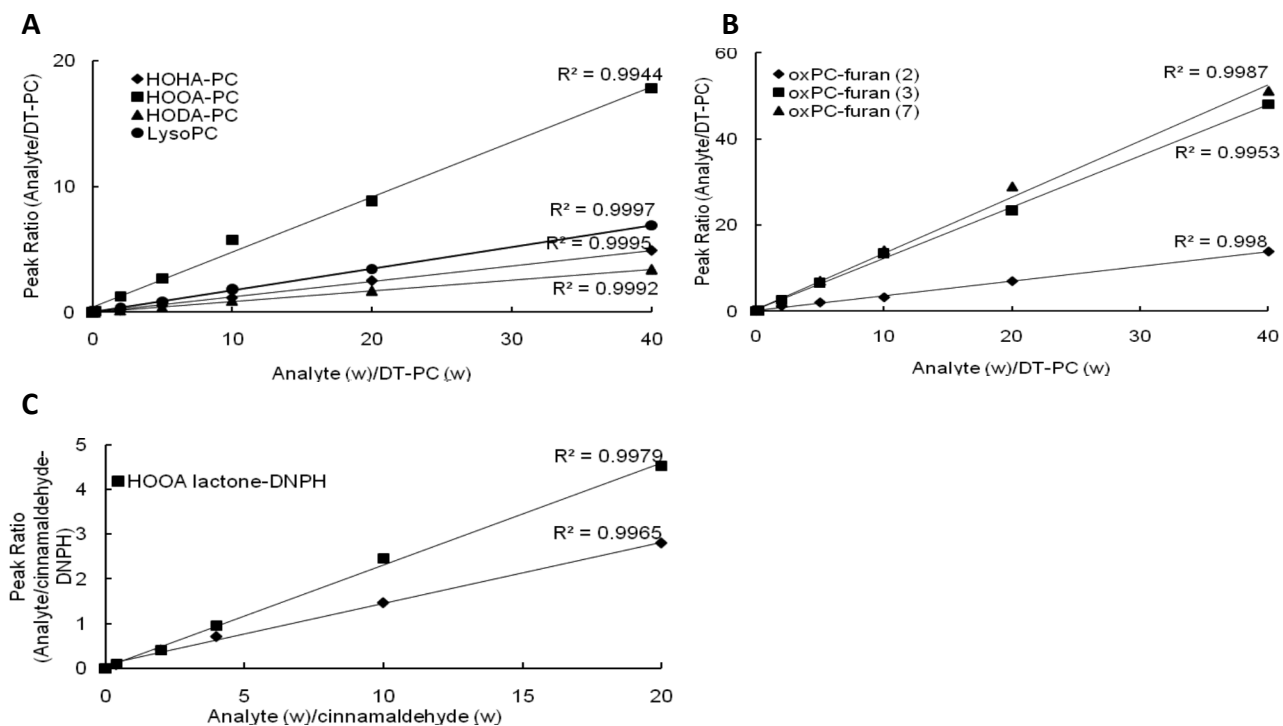

**Fig S3.** LC/ESI/MS/MS calibration curves of lysoPC, oxPC-furan, HOHA lactone-DNPH and HOOA lactone-DNPH and their precursors. Calibration curves for quantitative analyses of (A) and (B) were constructed by adding a 50 ng of internal standard DT-PC into various amounts of the indicated authentic synthetic phospholipids prior to extraction and LC/MS/MS analysis. In the case of (C), a constant amount of internal standard, cinnamaldehyde, was added before incubation procedure.
